# Supplementary figures and images for: Activation of tumor suppressor LKB1 abrogates growth and cancer stem-like phenotype of oral carcinoma via inhibition of oncogenic Stat3
Source: Research Square preprint supplement (doi:10.21203/rs.3.rs-8214477/v1), 2025-12-05

p-LKB1

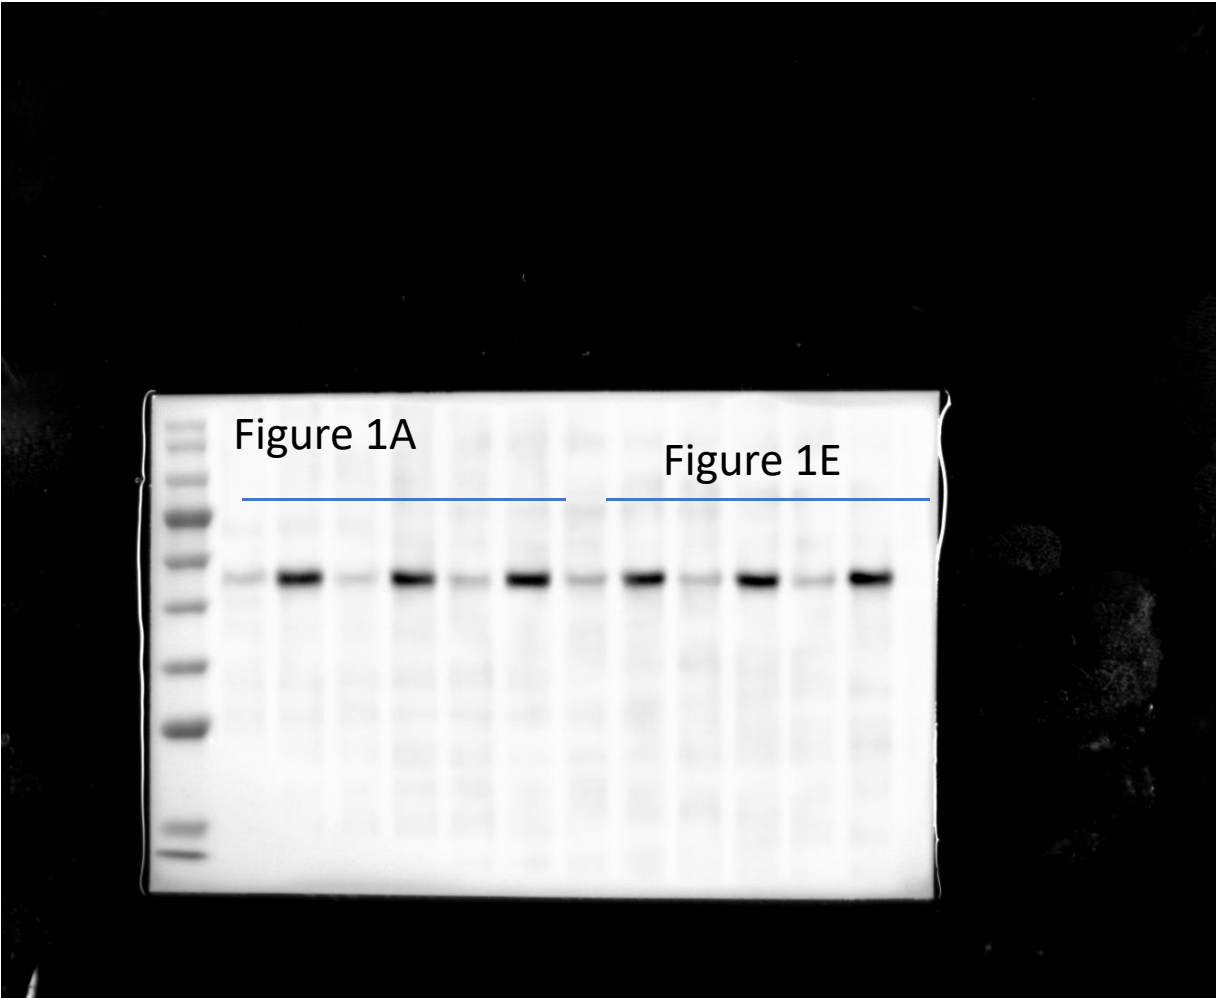

Actin

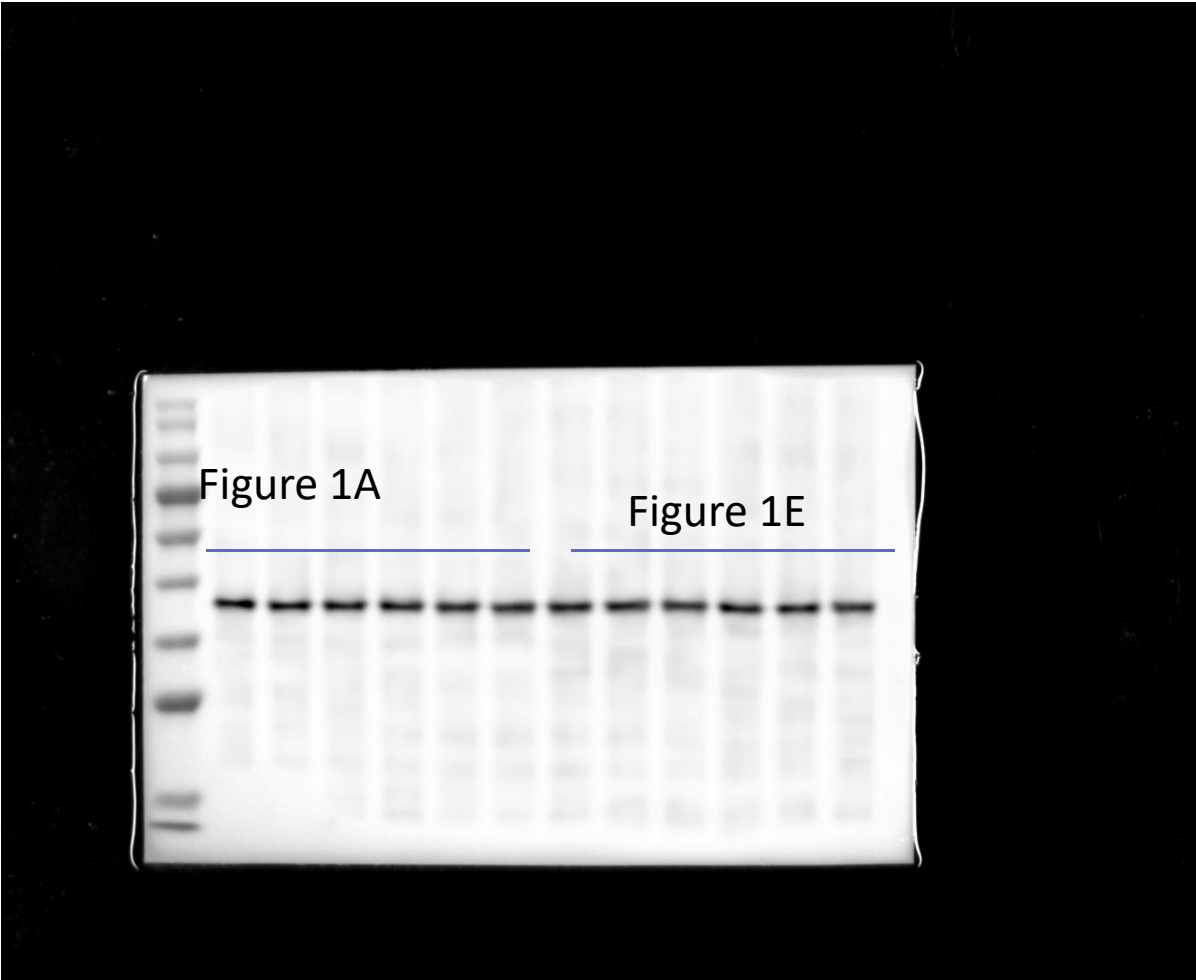

p-LKB1

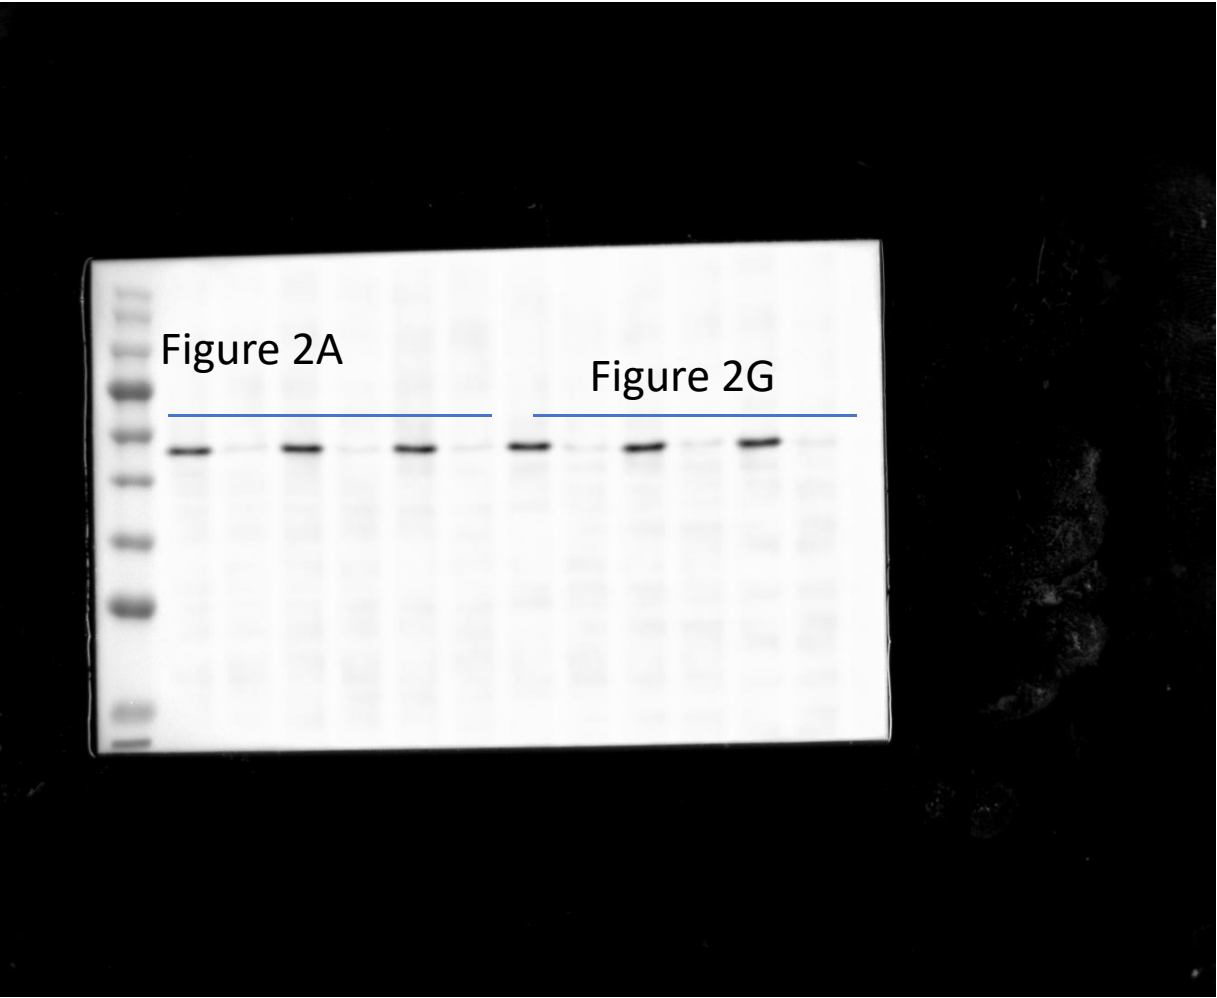

Actin

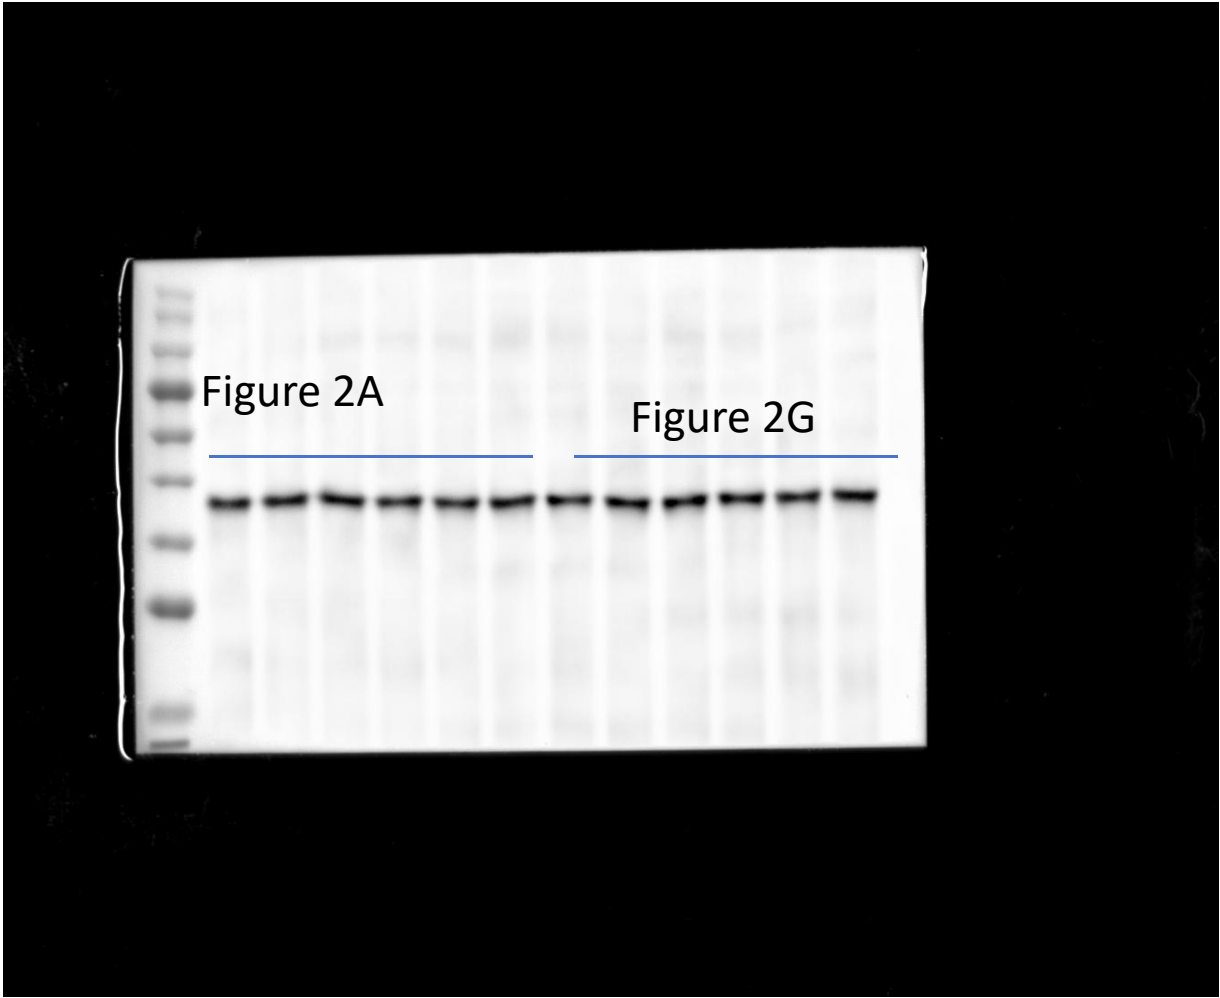

p-STAT3

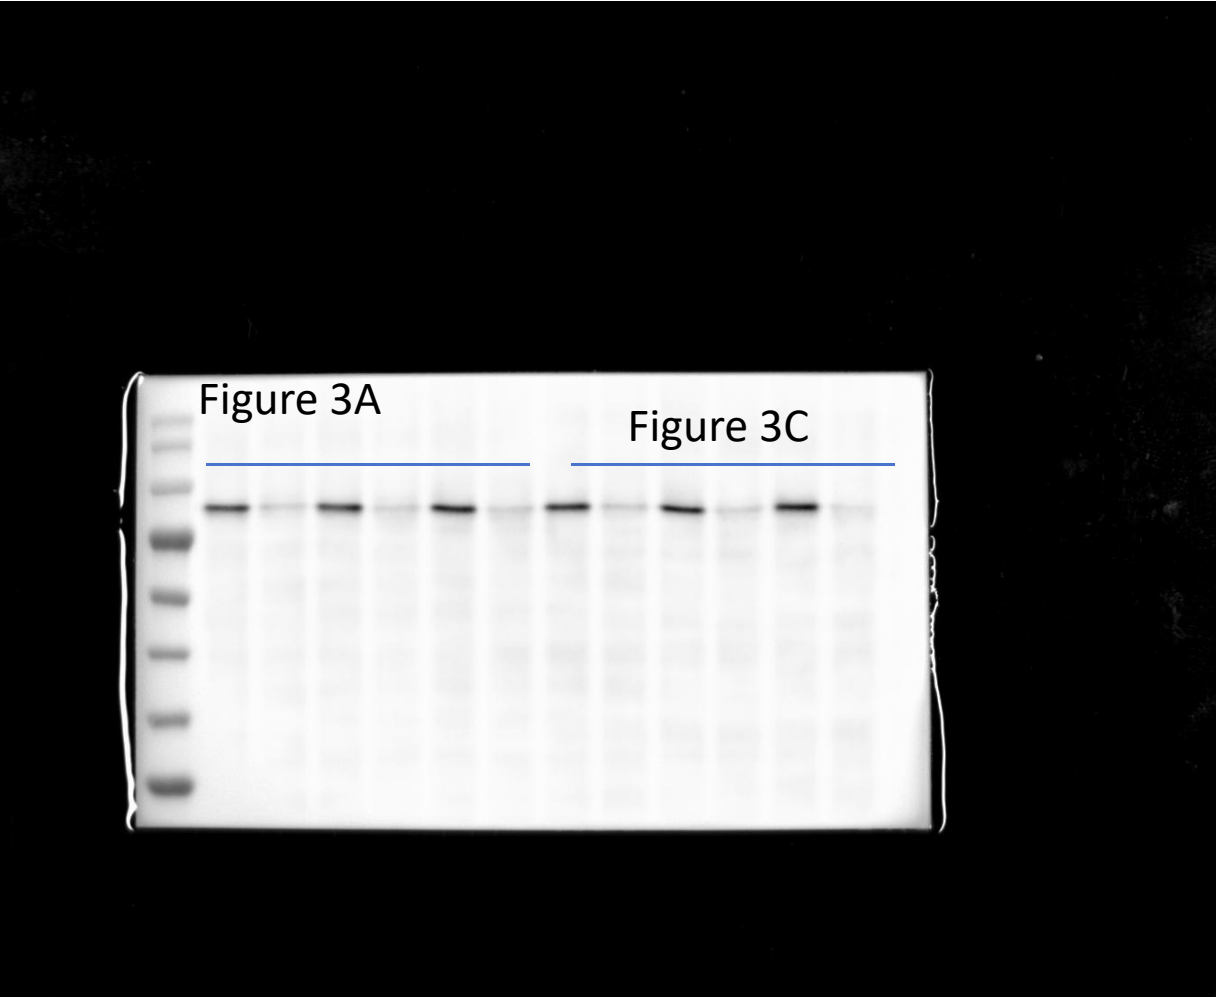

Actin

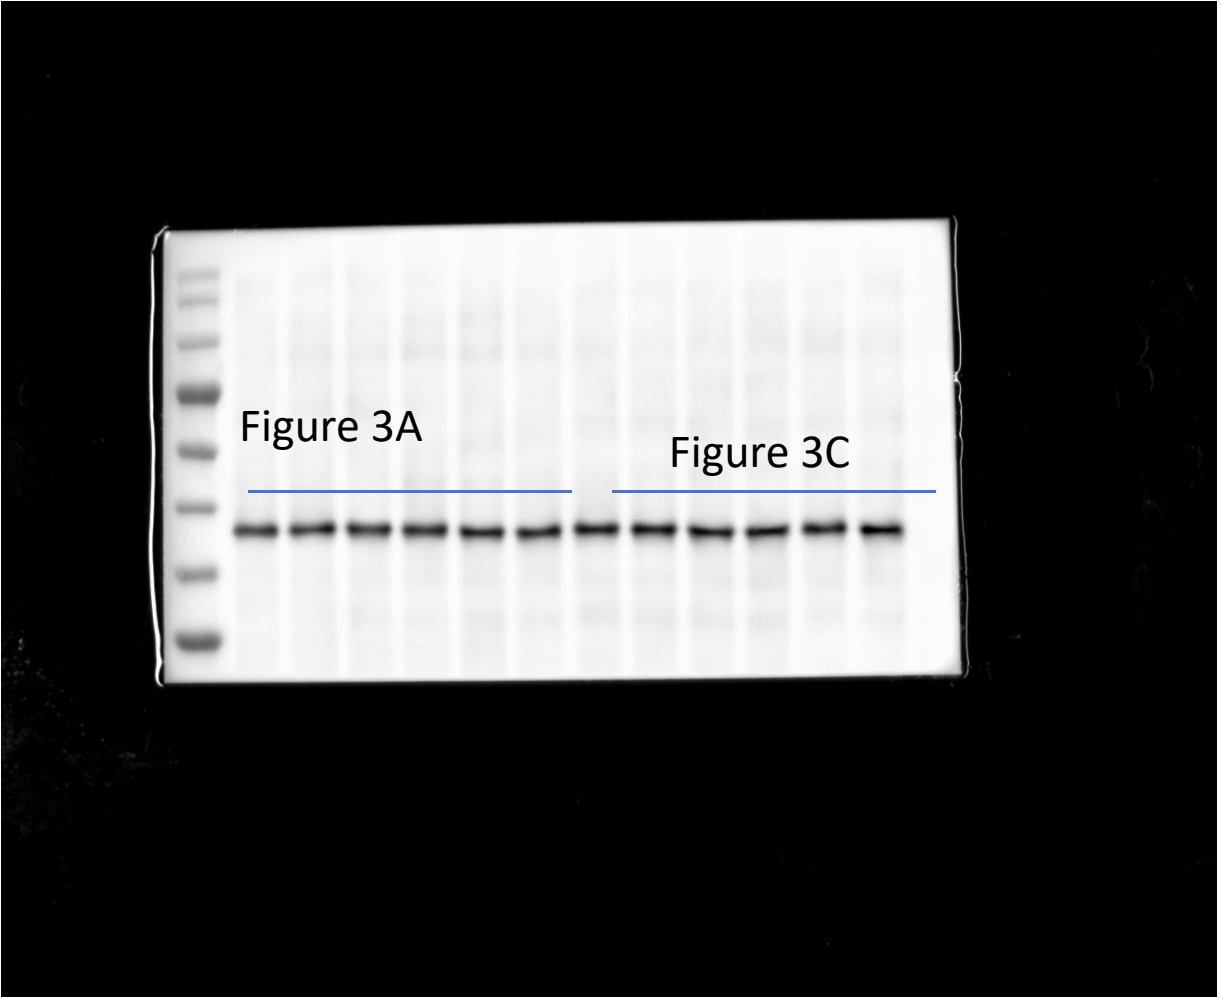

p-STAT3

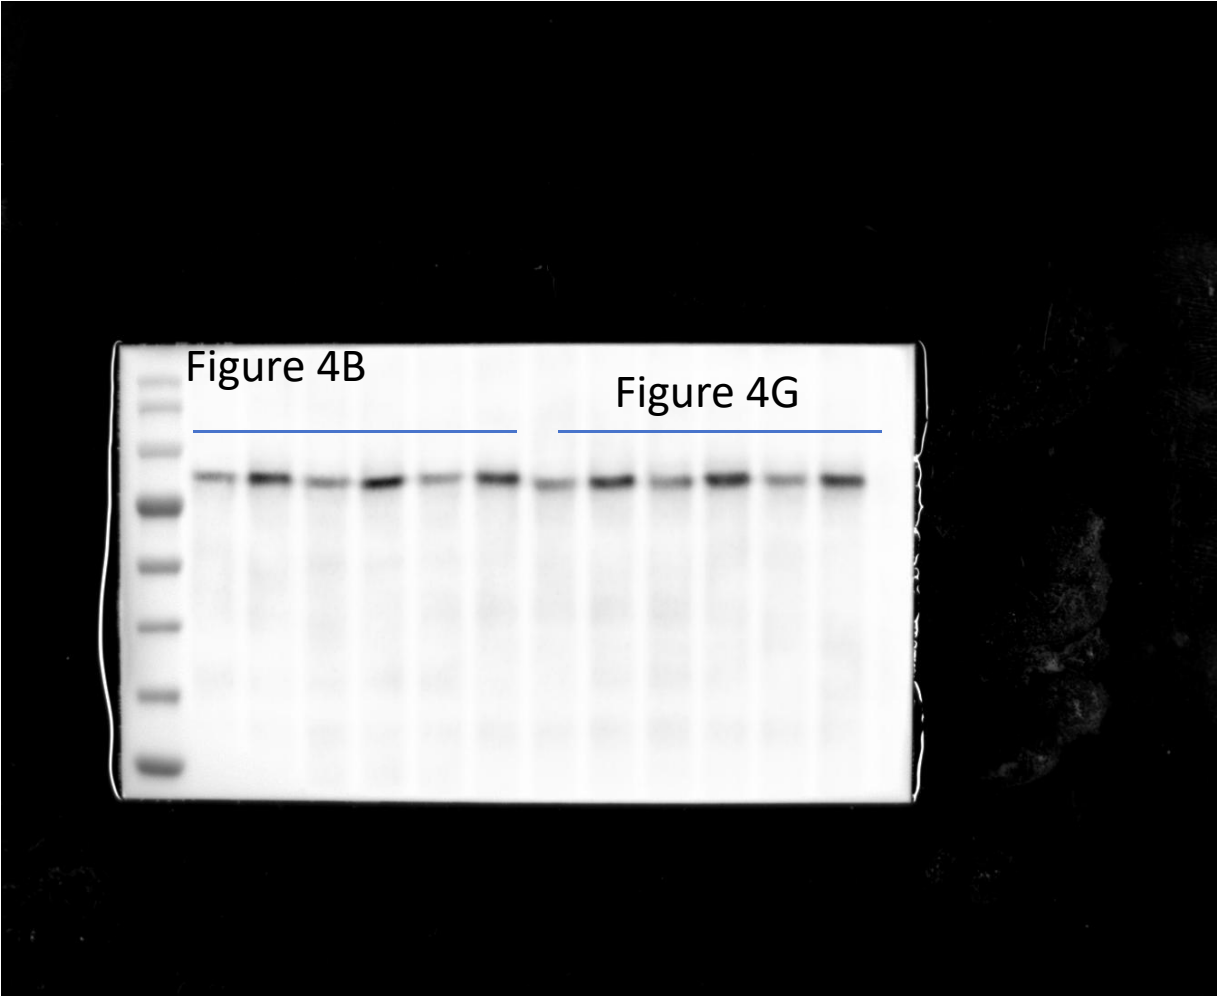

Actin

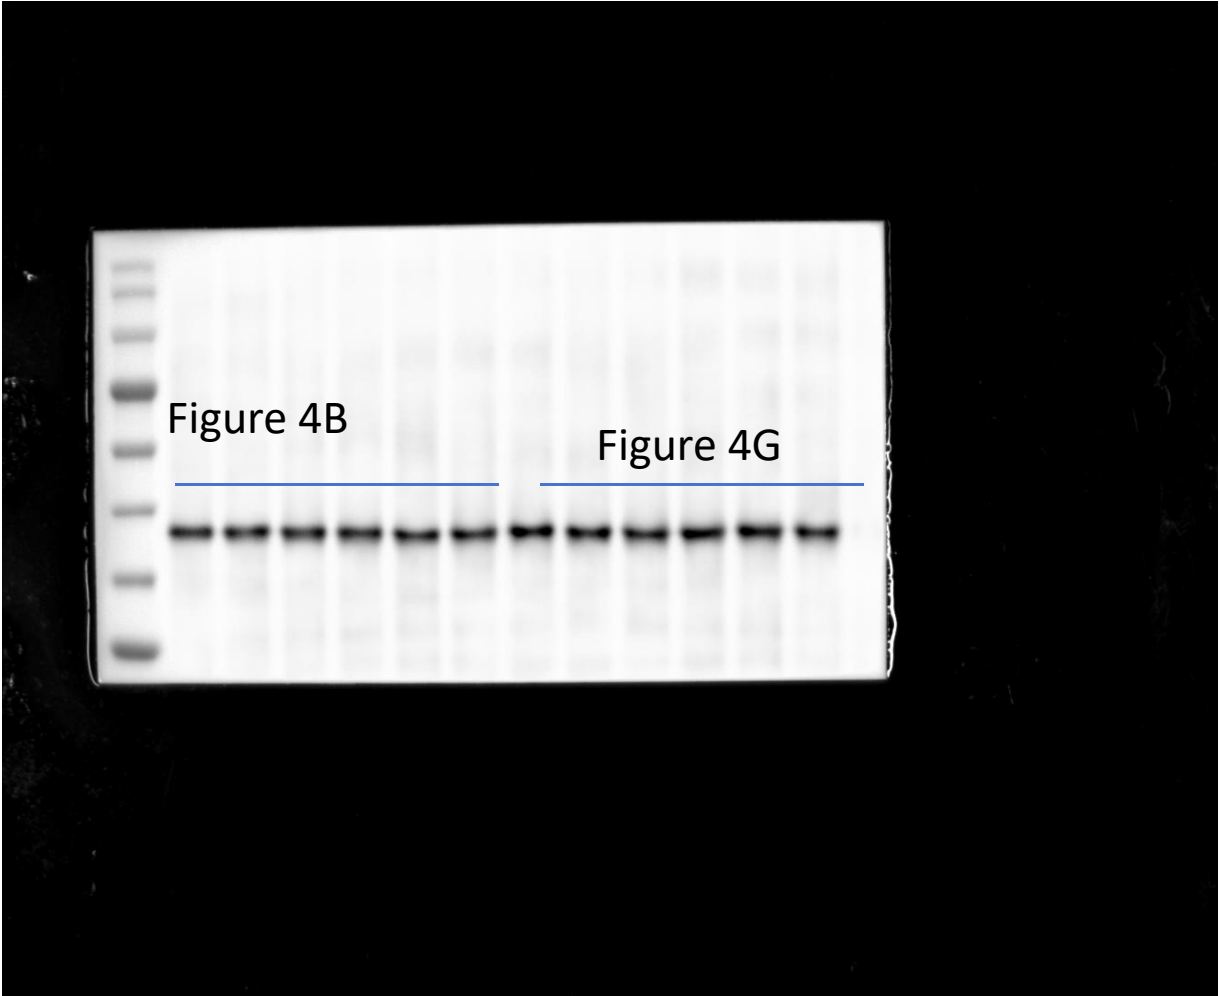

Supplement: Supplementary file 1 [file e8974565efee28c9d8b61ab6.pdf]
